# Supplementary material for: Efficacy of Oral Cryotherapy on Oral Mucositis Prevention in Patients with Hematological Malignancies Undergoing Hematopoietic Stem Cell Transplantation: A Meta-Analysis of Randomized Controlled Trials
Source: PubMed Central journal article supplement (PMC4449217; doi:10.1371/journal.pone.0128763), 2015-05-29
Supplement: pone.0128763.s004.pdf [file pone.0128763.s004.pdf]

**Table S1 Search criterion of PubMed (from inception to Oct 31, 2014)**

| <b>No.</b> | <b>Query Results</b>                                                                                                                                                 | <b>Results</b> |
|------------|----------------------------------------------------------------------------------------------------------------------------------------------------------------------|----------------|
| #10        | Search (((oral cooling) OR cryotherapy) OR "Cryotherapy"[Mesh]) AND (((mucositis) OR stomatitis) OR "Stomatitis"[Mesh] OR ("Mucositis"[Mesh] OR "Stomatitis"[Mesh])) | 105            |
| #9         | Search (((mucositis) OR stomatitis) OR "Stomatitis"[Mesh] OR ("Mucositis"[Mesh] OR "Stomatitis"[Mesh]))                                                              | 29941          |
| #8         | Search "Mucositis"[Mesh] OR "Stomatitis"[Mesh]                                                                                                                       | 14162          |
| #7         | Search "Stomatitis"[Mesh]                                                                                                                                            | 13458          |
| #6         | Search stomatitis                                                                                                                                                    | 24667          |
| #5         | Search mucositis                                                                                                                                                     | 6892           |
| #4         | Search ((oral cooling) OR cryotherapy) OR "Cryotherapy"[Mesh]                                                                                                        | 24938          |
| #3         | Search "Cryotherapy"[Mesh]                                                                                                                                           | 20300          |
| #2         | Search cryotherapy                                                                                                                                                   | 24294          |
| #1         | Search oral cooling                                                                                                                                                  | 694            |
