# Supplementary material for: Efficacy of Oral Cryotherapy on Oral Mucositis Prevention in Patients with Hematological Malignancies Undergoing Hematopoietic Stem Cell Transplantation: A Meta-Analysis of Randomized Controlled Trials
Source: PubMed Central journal article supplement (PMC4449217; doi:10.1371/journal.pone.0128763), 2015-05-29
Supplement: pone.0128763.s005.pdf [file pone.0128763.s005.pdf]

**Table S2 Search criterion of Cochrane Library (from inception to Oct 31, 2014)**

| <b>No.</b> | <b>Query Results</b>                                       | <b>Results</b> |
|------------|------------------------------------------------------------|----------------|
| #1         | oral cooling:ti,ab,kw (Word variations have been searched) | 99             |
| #2         | cryotherapy:ti,ab,kw (Word variations have been searched)  | 946            |
| #3         | MeSH descriptor: [Cryotherapy] explode all trees           | 1197           |
| #4         | #1 or #2 or #3                                             | 1752           |
| #5         | mucositis:ti,ab,kw (Word variations have been searched)    | 1397           |
| #6         | stomatitis:ti,ab,kw (Word variations have been searched)   | 1653           |
| #7         | MeSH descriptor: [Mucositis] explode all trees             | 73             |
| #8         | MeSH descriptor: [Stomatitis] explode all trees            | 693            |
| #9         | #5 or #6 or #7 or #8                                       | 2725           |
| #10        | #4 and #9                                                  | 37             |
